# Supplementary material for: ABA and Not Chilling Reduces Heat Requirement to Force Cherry Blossom after Endodormancy Release
Source: MDPI journal article supplement (doi:10.3390/plants11152044), 2022-08-04
Supplement: s1 [file s1]

## Supplementary Figures

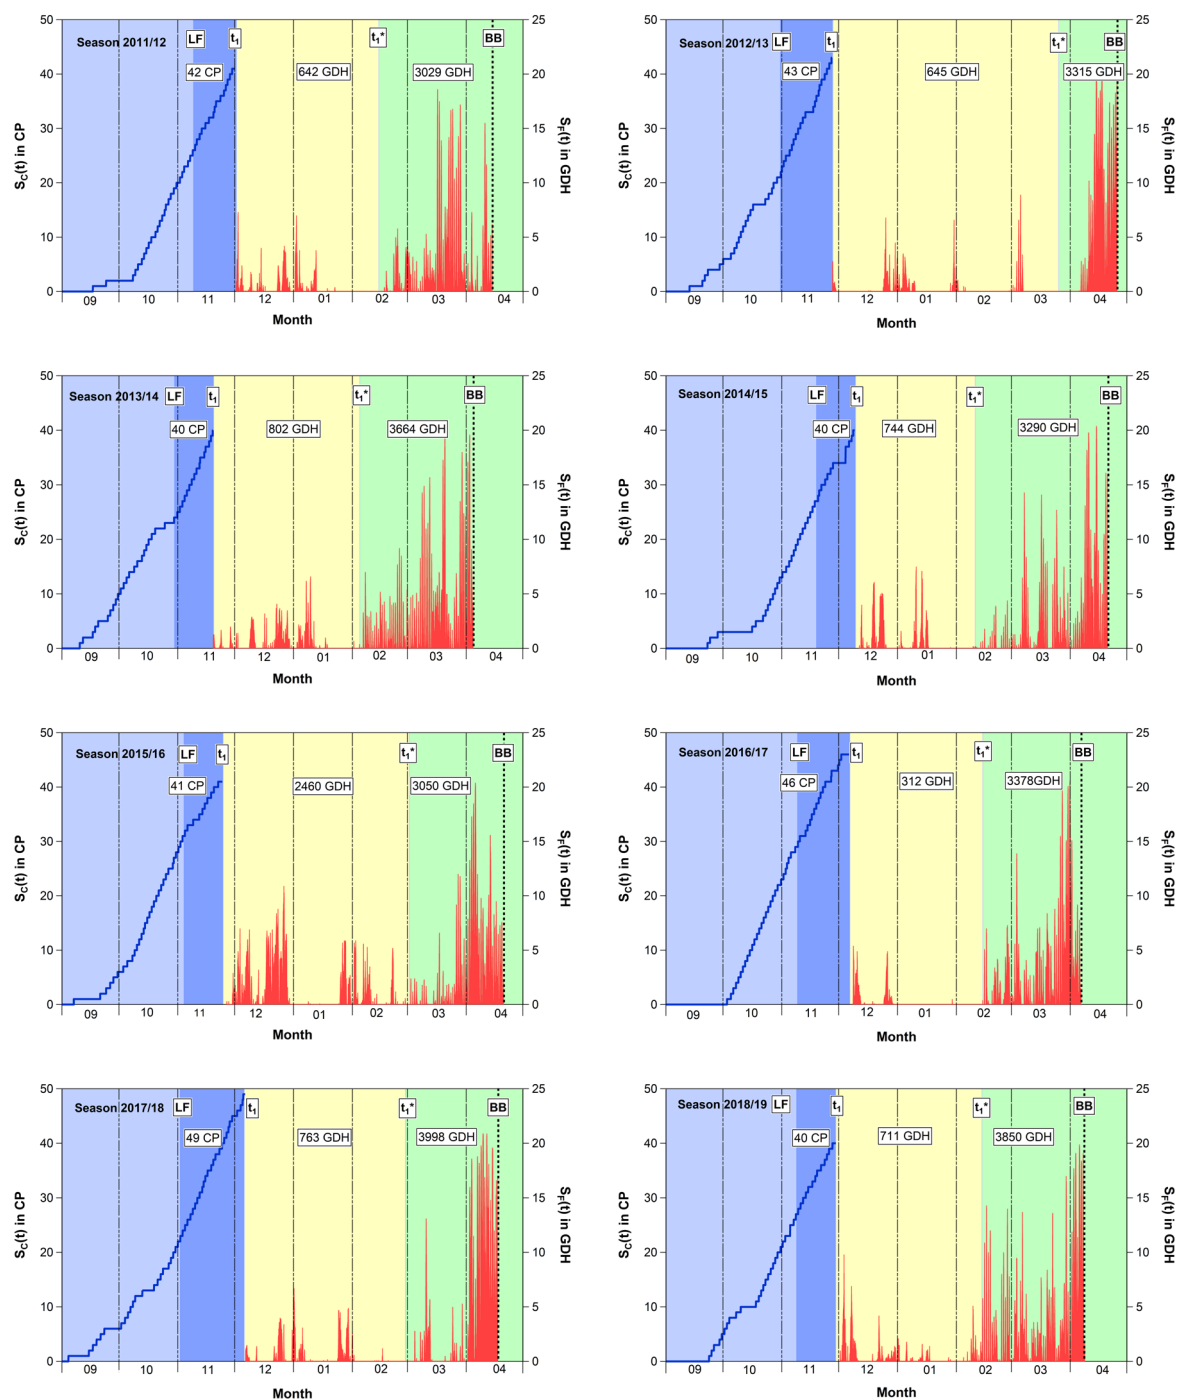

**Figure S1.** Chill accumulation  $S_c(t)$  in chill portion (CP) between 1 September and endodormancy release ( $t_1$ ) as well as hourly forcing units  $S_F(t)$  in growing degree hours (GDH) during ecodormancy ( $t_1$ - $t_1^*$ ) and ontogenetic development ( $t_1^*$ -BB) in the experimental sweet cherry orchard Berlin-Dahlem, seasons 2011/12-2018/19.  $t_1^*$ : beginning of ontogenetic development, BB: Beginning of blossom (BBCH 60).

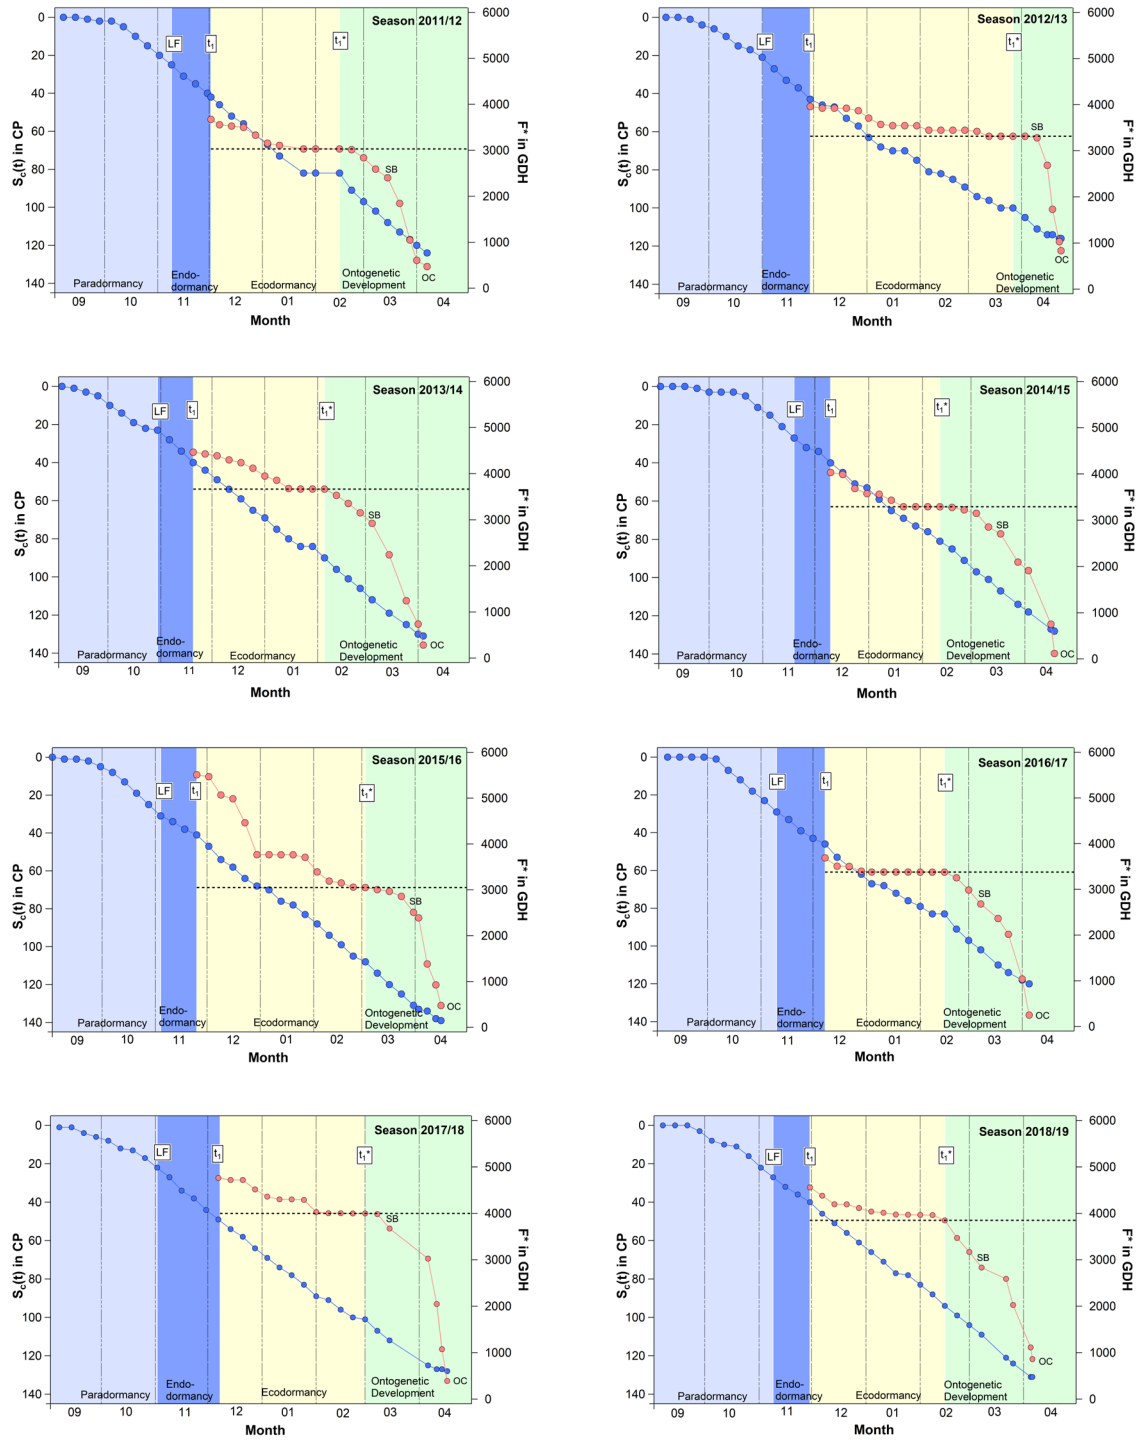

**Figure S2.** State of chilling  $S_c(t)$  in chill portions (CP) from 1 September until ‘open cluster’ (blue line) and heat requirement  $F^*$  until cherry blossom (red line) in the experimental sweet cherry orchard Berlin-Dahlem, seasons 2011/12-2018/19. Presented are weekly data, after ‘swollen bud’ (SB) development orientated for ‘side green’ (SG), ‘green tip’ (GT), ‘tight cluster\*’ (TC), ‘open cluster’ (OC). LF: ‘total leaf fall’,  $t_1$ : endodormancy release,  $t_1^*$ : beginning of ontogenetic development. The horizontal dashed line indicates the forcing requirement until blossom from  $t_1^*$ .

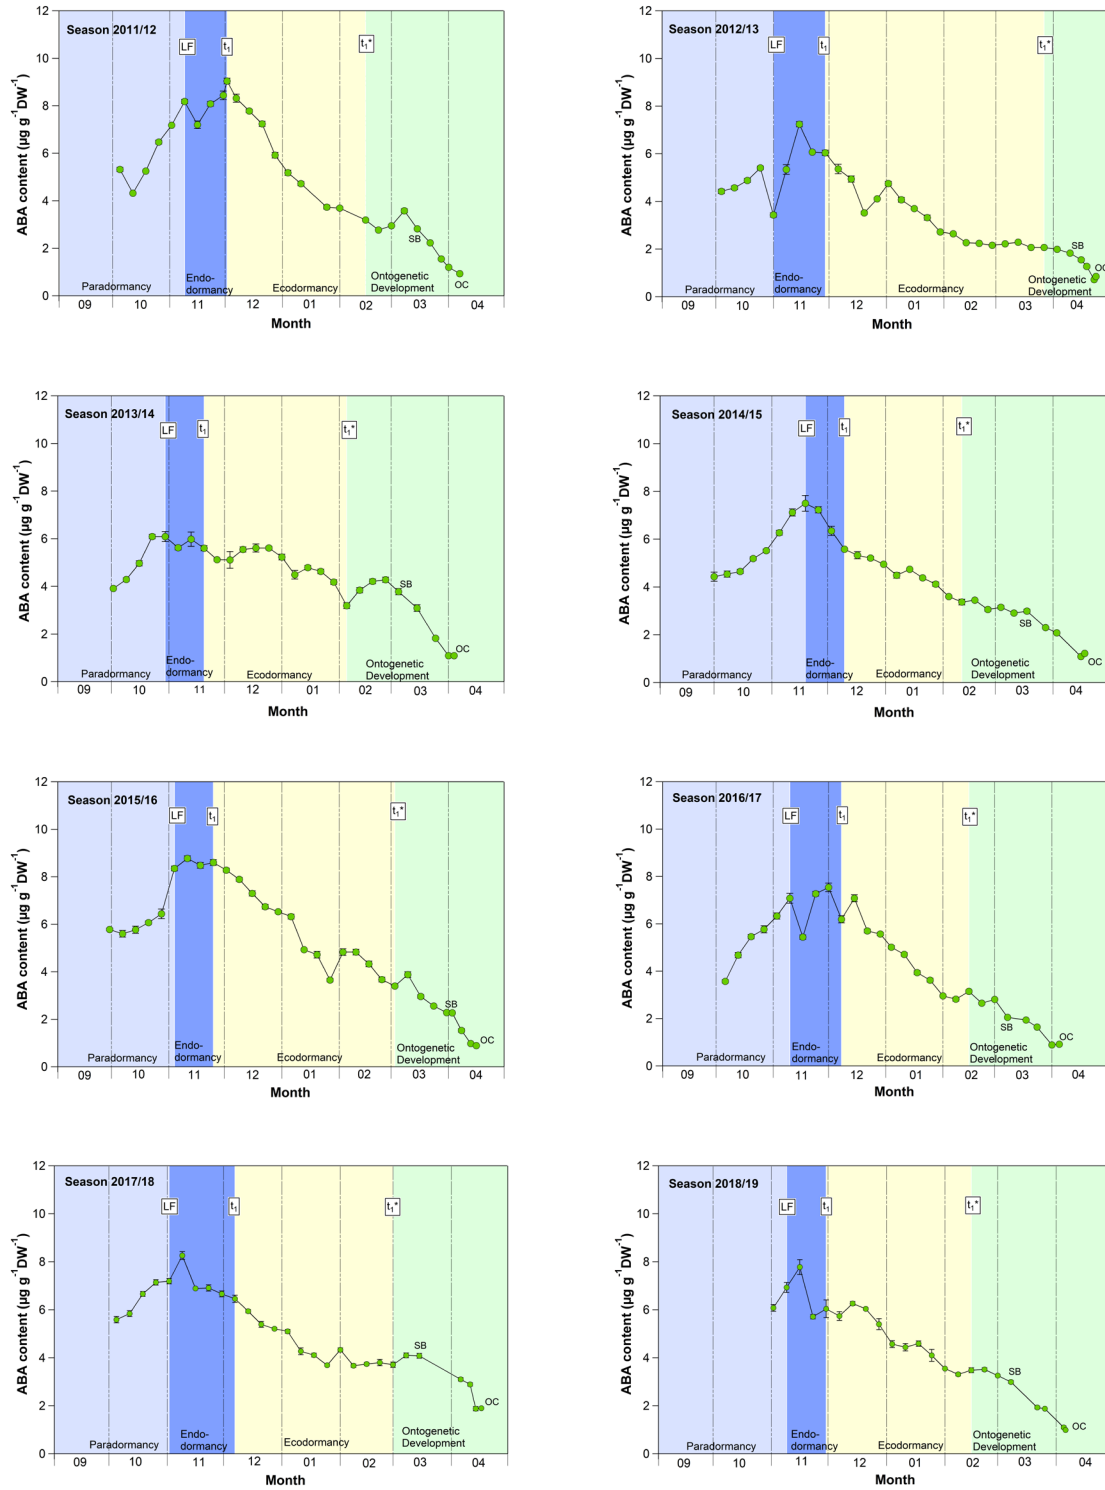

**Figure S3.** ABA content of sweet cherry flower buds (cv. Summit) between beginning of October (previous year) and ‘open cluster’ of the flowering year in the seasons 2011/12-2018/19. LF: ‘total leaf fall’, t<sub>1</sub>: endodormancy release, t<sub>1</sub>\*: beginning of ontogenetic development, Stages after ‘swollen bud’ (SB): ‘side green’, ‘green tip’, ‘tight cluster’, ‘open cluster’ (OC).

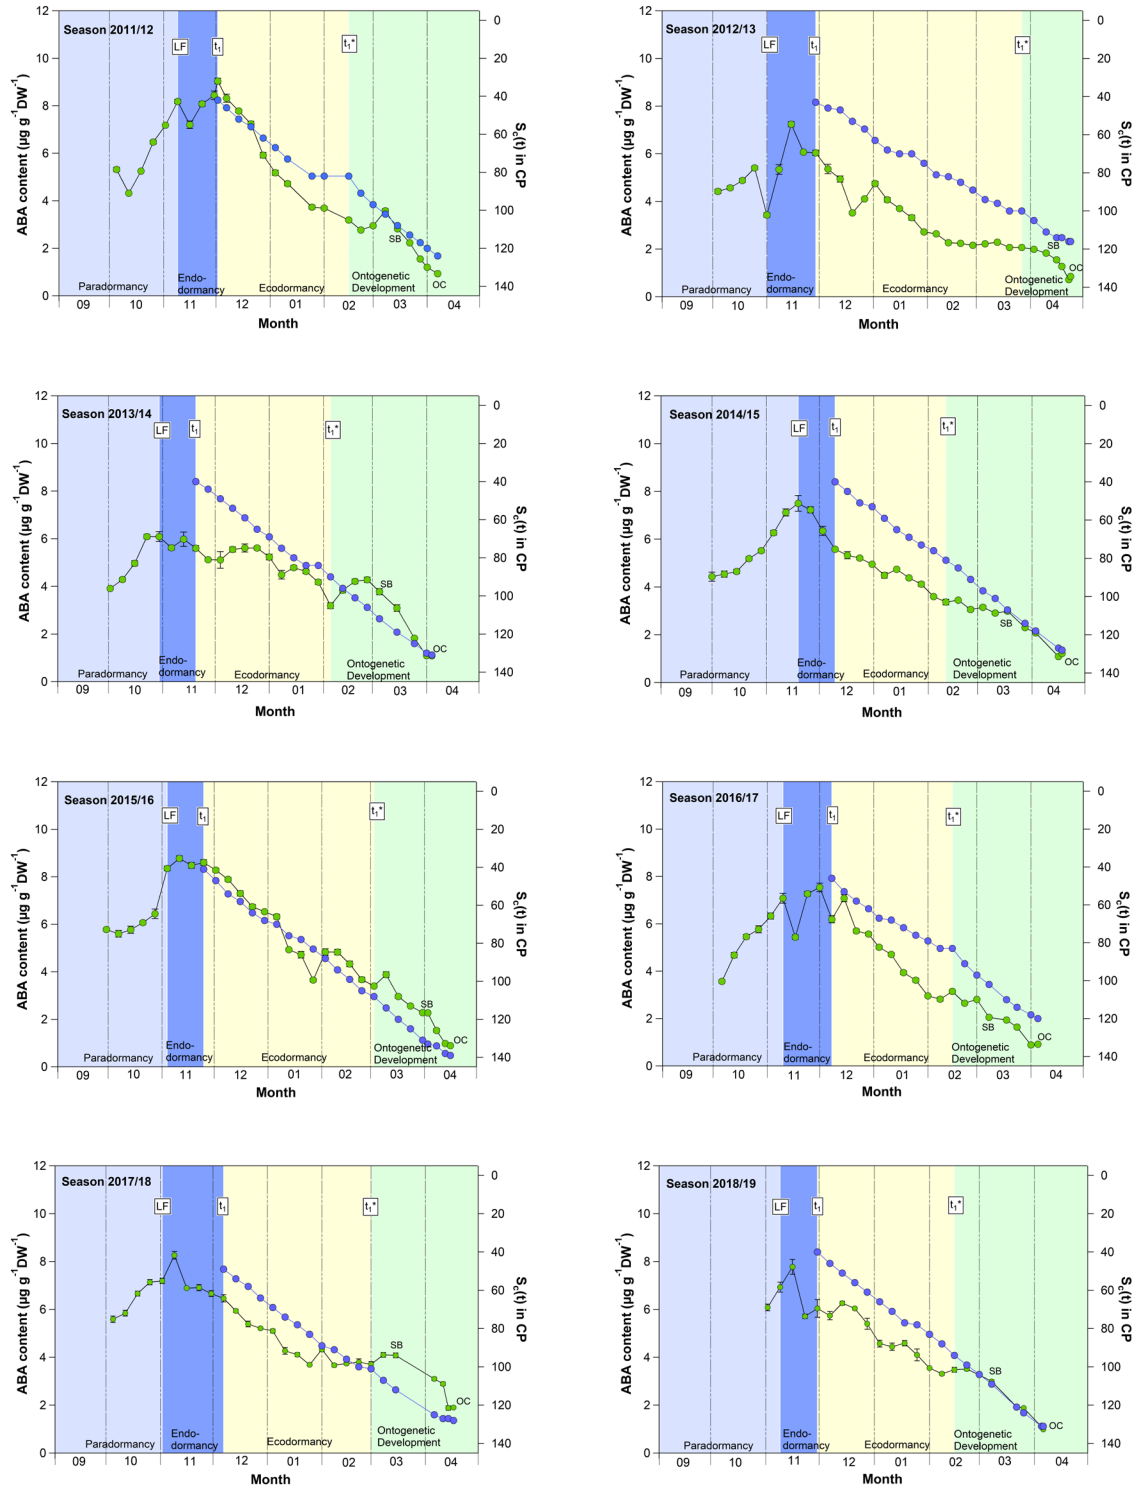

**Figure S4.** ABA content of sweet cherry flower buds (cv. Summit) between beginning of October (previous year) and ‘open cluster’ of the flowering year and chill accumulation  $S_c(t)$  in chill portions (CP) between endodormancy release ( $t_1$ ) and ‘open cluster’ in the season 2011/12–2018/19. LF: ‘total leaf fall’,  $t_1$ : endodormancy release,  $t_1^*$ : beginning of ontogenetic development, Stages after ‘swollen bud’ (SB): ‘side green’, ‘green tip’, ‘tight cluster’, ‘open cluster’ (OC).

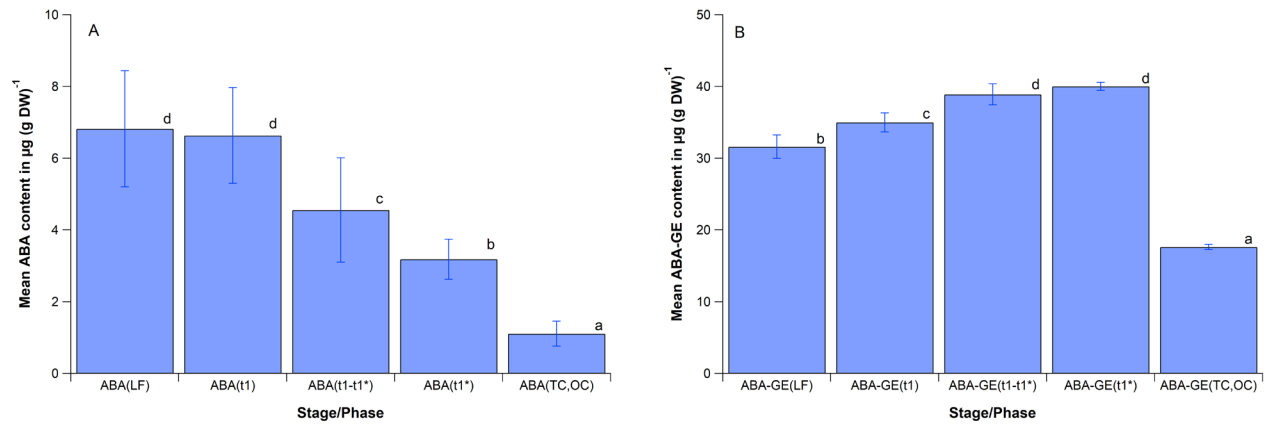

**Figure S5.** ABA and ABA-GE content of sweet cherry buds (cv. Summit) at selected phenological stages and during ecodormancy, in the season 2011/12-2018/19. LF: ‘total leaf fall’,  $t_1$ : endodormancy release,  $t_1^*$ : beginning of ontogenetic development, ‘tight cluster’ (TC), ‘open cluster’ (OC), ecodormancy phase ( $t_1$ - $t_1^*$ ).
